# Supplementary material
Source: PubMed Central journal article supplement (PMC9578402)
Supplement: aac.00817-22-s0001.pdf [file aac.00817-22-s0001.pdf]

**Supplementary table 1.** *P. falciparum* proteasome specific probes used for molecular inversion probe (MIP) capture.

| Subunit                   | Capture start <sup>a</sup> | Capture end <sup>a</sup> | Capture size | Probe sequence                                                                                                             |
|---------------------------|----------------------------|--------------------------|--------------|----------------------------------------------------------------------------------------------------------------------------|
| <b>β2</b>                 | 1184250                    | 1184441                  | 243          | AGTAAAAATATATGGTGTGCAGGTGCNNN<br>NAGATCGGAAGAGCACACGTGACTCGCCA<br>AGCTGAAGNNNNNNNNNNNAAATATACTCA<br>AAGAAGAAAACGGA         |
| <b>β2</b>                 | 1184347                    | 1184562                  | 268          | ATCCACAGATTGTTGTTTCCTGTTTTTCNNN<br>NAGATCGGAAGAGCACACGTGACTCGCCA<br>AGCTGAAGNNNNNNNNNNNTCTTGAGTTAA<br>TCTTGATACACACA       |
| <b>β2</b>                 | 1184552                    | 1184734                  | 238          | GGCAGTATTAGAAGCAAATATAGAGACA<br>NNNNAGATCGGAAGAGCACACGTGACTCG<br>CCAAGCTGAAGNNNNNNNNNNNCATCGTTT<br>AAATACAAATACACAACC      |
| <b>β2</b>                 | 1184644                    | 1184794                  | 200          | CATCTACTCCACCTAATACTATTGCACNNN<br>NAGATCGGAAGAGCACACGTGACTCGCCA<br>AGCTGAAGNNNNNNNNNNNACCTGCACATA<br>TAGCTTCACAT           |
| <b>β2</b>                 | 1184786                    | 1184946                  | 214          | CAAAGGAACCACACCTATTTTATCTGNN<br>NNAGATCGGAAGAGCACACGTGACTCGCC<br>AAGCTGAAGNNNNNNNNNNNGACAATATG<br>ACAATAGAAGAAGGAAA        |
| <b>β2</b>                 | 1184859                    | 1185003                  | 200          | ACATATATCTACATTACCACCAGAACCTN<br>NNNAGATCGGAAGAGCACACGTGACTCGC<br>CAAGCTGAAGNNNNNNNNNNNTAGTTATAA<br>CTTATGCATCTTCTACAG     |
| <b>PF3D7_08<br/>08300</b> | 421700                     | 421861                   | 221          | AGAGGTAAAAGAAAAACATAAATTTGTAT<br>GCNNNNAGATCGGAAGAGCACACGTGACT<br>CGCCAAGCTGAAGNNNNNNNNNNNCAGTGT<br>TATGAAACTAATAATACATGAC |
| <b>PF3D7_08<br/>08300</b> | 421852                     | 422051                   | 250          | GGTATAATGGGCCACTCGTTCATTATNNN<br>NAGATCGGAAGAGCACACGTGACTCGCCA<br>AGCTGAAGNNNNNNNNNNNGGCAATTTGG<br>ATTTGAAAAGATTC          |

---

|                                   |        |        |     |                                                                                                                             |
|-----------------------------------|--------|--------|-----|-----------------------------------------------------------------------------------------------------------------------------|
| <b>PF3D7_08<br/>08300</b>         | 422033 | 422184 | 200 | GCAGGGATATTACCAAAGAATTTGCNNN<br>NAGATCGGAAGAGCACACGTGACTCGCCA<br>AGCTGAAGNNNNNNNNNAGCGGACTAG<br>AGGTACAAAATT                |
| <b>PF3D7_08<br/>08300</b>         | 422139 | 422285 | 202 | CGAAATTCACCATCATCTACTATAAAACC<br>NNNNAGATCGGAAGAGCACACGTGACTCG<br>CCAAGCTGAAGNNNNNNNNNCACCTTGA<br>CCTTTATATAATTCTTGT        |
| <b>PF3D7_08<br/>08300</b>         | 422258 | 422456 | 260 | TACGCAAAAATTTAATTATGATCATAACAGT<br>TGNNNNAGATCGGAAGAGCACACGTGACT<br>CGCCAAGCTGAAGNNNNNNNNNGAATG<br>TAGCTATAAAAGATAAGAGTAATC |
| <b>PF3D7_08<br/>08300</b>         | 422337 | 422549 | 270 | CTTGAGATAGTACCACCTAATTTAACACCN<br>NNNAGATCGGAAGAGCACACGTGACTCGC<br>CAAGCTGAAGNNNNNNNNNTTCATTCT<br>GTTAATTAATTTAAGAGGG       |
| <b>PF3D7_08<br/>08300</b>         | 422549 | 422734 | 246 | TTTGAAATATGTGGTGCAGTTATATAATAT<br>GTNNNNAGATCGGAAGAGCACACGTGACT<br>CGCCAAGCTGAAGNNNNNNNNNCCAGTT<br>AATTTTTCGTTATCATATGATT   |
| <b><math>\alpha</math>-type-6</b> | 387234 | 387385 | 202 | ACATTTTCATTACAATCATCAAGGGTACNN<br>NNAGATCGGAAGAGCACACGTGACTCGCC<br>AAGCTGAAGNNNNNNNNNAAACAAAAT<br>GGTAAGGCCTCA              |
| <b><math>\alpha</math>-type-6</b> | 387255 | 387407 | 205 | GTGTCTATCATACTACTGTGAAGGNN<br>NNAGATCGGAAGAGCACACGTGACTCGCC<br>AAGCTGAAGNNNNNNNNNATGATCACA<br>ATTGTTATTTGTACCC              |
| <b><math>\alpha</math>-type-6</b> | 387414 | 387625 | 266 | GTACCCTTGATGATTGTAATGAAAATGTN<br>NNNAGATCGGAAGAGCACACGTGACTCGC<br>CAAGCTGAAGNNNNNNNNNGAGCATCCT<br>ATTCATCTGTTATATT          |
| <b><math>\alpha</math>-type-6</b> | 387540 | 387729 | 240 | CACAATTTTCTCCCTTTACTCCTACGNNNN<br>AGATCGGAAGAGCACACGTGACTCGCCAA<br>GCTGAAGNNNNNNNNNGTTTCGGCATT<br>ACATTATATCCG              |

---

|                                   |        |        |     |                                                                                                                              |
|-----------------------------------|--------|--------|-----|------------------------------------------------------------------------------------------------------------------------------|
| <b><math>\alpha</math>-type-6</b> | 387589 | 387791 | 254 | CACAACATGCCTATATGAGACTACACNNN<br>NAGATCGGAAGAGCACACGTGACTCGCCA<br>AGCTGAAGNNNNNNNNNTGGCTACACA<br>ATATATTTCTCAAGA             |
| <b><math>\alpha</math>-type-6</b> | 387775 | 387943 | 221 | TCACAAATATTTCTACATAACGTTTCGGNN<br>NNAGATCGGAAGAGCACACGTGACTCGCC<br>AAGCTGAAGNNNNNNNNNATATGACCC<br>G TTCAGGTAATTTTT           |
| <b><math>\alpha</math>-type-6</b> | 387904 | 388069 | 212 | TGGTTTTTGTGCGGGATATCGTNNNNAGAT<br>CGGAAGAGCACACGTGACTCGCCAAGCTG<br>AAGNNNNNNNNNGCATAAATGTGTGAA<br>ATGTGCTAT                  |
| <b><math>\alpha</math>-type-6</b> | 388033 | 388222 | 238 | CATCTATGCCAATAATCATTCCACCTNNNN<br>AGATCGGAAGAGCACACGTGACTCGCCAA<br>GCTGAAGNNNNNNNNNTGCGAGAATTGT<br>TTGTAAAGCT                |
| <b><math>\alpha</math>-type-6</b> | 388104 | 388261 | 207 | CGAAATAGAAGTTGCAATCGTATCAACNN<br>NNAGATCGGAAGAGCACACGTGACTCGCC<br>AAGCTGAAGNNNNNNNNNGGGATATCG<br>TGCTTGTGTTATT               |
| <b><math>\alpha</math>-type-6</b> | 388145 | 388339 | 250 | AATCTTTCTAAAACACTTATGCTCTCTTGN<br>NNNAGATCGGAAGAGCACACGTGACTCGC<br>CAAGCTGAAGNNNNNNNNNCTTAATCCC<br>TCTCAGCTATATATGTT         |
| <b><math>\beta</math>5</b>        | 441150 | 441319 | 233 | TGTTATGTGAATAAAAATTTATGTAACATT<br>CATATNNNNAGATCGGAAGAGCACACGTG<br>ACTCGCCAAGCTGAAGNNNNNNNNNTGA<br>TTATAATTTAAATCTAGACCAAGCT |
| <b><math>\beta</math>5</b>        | 441249 | 441426 | 236 | AATCATCAACATAAAACATATTAATCCG<br>GNNNNAGATCGGAAGAGCACACGTGACTC<br>GCCAAGCTGAAGNNNNNNNNNGTCATAT<br>CCATTTTTGTGAATATGAAA        |
| <b><math>\beta</math>5</b>        | 441380 | 441557 | 239 | ACATATGCTTATTCTATTTTAGATTCAGCA<br>NNNNAGATCGGAAGAGCACACGTGACTCG<br>CCAAGCTGAAGNNNNNNNNNTAAAGATT<br>TATGAATTAAGAAATAACGAAA    |
| <b><math>\beta</math>5</b>        | 441483 | 441659 | 240 | TTATTTATTTCAATAATCTTTTCAACATTCT<br>GTGANNNNAGATCGGAAGAGCACACGTG                                                              |

---

|                       |        |        |     |                                                                                                                             |
|-----------------------|--------|--------|-----|-----------------------------------------------------------------------------------------------------------------------------|
|                       |        |        |     | ACTCGCCAAGCTGAAGNNNNNNNNNGGT<br>ATGATCATAACCACTTAAAATAATA                                                                   |
| <b>β5</b>             | 441627 | 441796 | 230 | TGATTGCTTATATTGGGAAAAATATTTAGG<br>TANNNNAGATCGGAAGAGCACACGTGACT<br>CGCCAAGCTGAAGNNNNNNNNNAAAAT<br>ATGCACAAACTCAAAATAAGAAA   |
| <b>β5</b>             | 441714 | 441899 | 248 | TCATTTATTAAATTATCAATTTTCATTCATA<br>AAGCTNNNNAGATCGGAAGAGCACACGTG<br>ACTCGCCAAGCTGAAGNNNNNNNNNTTC<br>TGTGAAGATATAAAAGATCCATA |
| <b>β5</b>             | 441854 | 442024 | 230 | GCTCCAGTGAATGTACCAAGAAATNNNNA<br>GATCGGAAGAGCACACGTGACTCGCCAAG<br>CTGAAGNNNNNNNNNATCATTCTAATT<br>TTAATTTTTATATTATCTCAAG     |
| <b>19S<br/>PfrPT4</b> | 297238 | 297324 | 137 | AGCACCATTAAATCCATCACACAATCNNN<br>NAGATCGGAAGAGCACACGTGACTCGCCA<br>AGCTGAAGNNNNNNNNNTTTCCTTCAC<br>TTATTTTTCTGGC              |
| <b>19S<br/>PfrPT4</b> | 297346 | 297492 | 195 | TAATACATCTGGTCGATTAGTAGCCANN<br>NAGATCGGAAGAGCACACGTGACTCGCCA<br>AGCTGAAGNNNNNNNNNCAGCACCATTA<br>AATCCATCACA                |
| <b>19S<br/>PfrPT4</b> | 297487 | 297576 | 143 | GCTTTAGTTAGACCAGGAAGATTAGATAG<br>NNNNAGATCGGAAGAGCACACGTGACTCG<br>CCAAGCTGAAGNNNNNNNNNGATAGAG<br>AAATACAGAGAACGCTT          |
| <b>19S<br/>PfrPT4</b> | 297560 | 297666 | 160 | TGGTTGATGTTTCCTTTGCATAATTAACNN<br>NNAGATCGGAAGAGCACACGTGACTCGCC<br>AAGCTGAAGNNNNNNNNNACCTAATTCT<br>TCAAATCCATCTAGG          |
| <b>19S<br/>PfrPT4</b> | 297635 | 297737 | 154 | AGGAGGTAGAAGATTTTCTCAAGGTACNN<br>NNAGATCGGAAGAGCACACGTGACTCGCC<br>AAGCTGAAGNNNNNNNNNTGAGAATTGT<br>TGTATCAGCTATTG            |
| <b>19S<br/>PfrPT4</b> | 297717 | 297820 | 157 | GGAGGACCATATAATAAAACACCTTTAGG<br>NNNNAGATCGGAAGAGCACACGTGACTCG                                                              |

---

---

|                       |        |        |     |                                                                                                                        |
|-----------------------|--------|--------|-----|------------------------------------------------------------------------------------------------------------------------|
|                       |        |        |     | CCAAGCTGAAGNNNNNNNNNNACATCTCT<br>CTAATAATACGTGCAC                                                                      |
| <b>19S<br/>PfRPT4</b> | 297811 | 297896 | 136 | AAAACATTATTAGCAAGAGCAATGGCNNN<br>NAGATCGGAAGAGCACACGTGACTCGCCA<br>AGCTGAAGNNNNNNNNNNNGACAGATGAG<br>AGAAGTAGTAGAGT      |
| <b>19S<br/>PfRPT4</b> | 297866 | 298022 | 208 | CTTCACATGGTAATCTTTTCATAACCGNNN<br>NAGATCGGAAGAGCACACGTGACTCGCCA<br>AGCTGAAGNNNNNNNNNNNCCTTTAGGTGT<br>TTTTATTCCAAC      |
| <b>19S<br/>PfRPT4</b> | 297954 | 298137 | 235 | ATAATCAAATAGGTGGGTAAAGTGAGCNN<br>NNAGATCGGAAGAGCACACGTGACTCGCC<br>AAGCTGAAGNNNNNNNNNNNTTTATTGTGA<br>AAGCTTCTAGTGGT     |
| <b>19S<br/>PfRPT4</b> | 298084 | 298288 | 258 | ACTTTACTCTCAATTTCTCTGTGTTCCANN<br>NAGATCGGAAGAGCACACGTGACTCGCCA<br>AGCTGAAGNNNNNNNNNNNGTCATATCTAA<br>TGATACTCTTGACC    |
| <b>19S<br/>PfRPT4</b> | 298195 | 298346 | 206 | GGACAAGTATTAACAACAGCTAGAAGATGN<br>NNNAGATCGGAAGAGCACACGTGACTCGC<br>CAAGCTGAAGNNNNNNNNNNNCTAATTAGT<br>TACGATGGATAACAAGG |
| <b>19S<br/>PfRPT4</b> | 298330 | 298417 | 138 | ATGTATGTATGTGTGTGTGCTAAACANN<br>NAGATCGGAAGAGCACACGTGACTCGCCA<br>AGCTGAAGNNNNNNNNNNNTCTGTGTTCAA<br>TAACTTTCTTCAC       |
| <b>19S<br/>PfRPT4</b> | 298366 | 298467 | 152 | GTTACGATGGATAACAAGGAAAGCANNNN<br>AGATCGGAAGAGCACACGTGACTCGCCAA<br>GCTGAAGNNNNNNNNNNNCCGTTAATATA<br>TTTGCTTGACATG       |
| <b>RPN10</b>          | 399641 | 399803 | 215 | TTTTTGATAAAAAGGAGGGAGACAGCNNN<br>NAGATCGGAAGAGCACACGTGACTCGCCA<br>AGCTGAAGNNNNNNNNNNNAAGAAGAAA<br>TATGGAAGATACTCC      |
| <b>RPN10</b>          | 399715 | 399930 | 267 | TCATTCACAAGAGCAAAATTGTCATCTNN<br>NNAGATCGGAAGAGCACACGTGACTCGCC                                                         |

---

---

|              |        |        |     |                                                                                                                      |
|--------------|--------|--------|-----|----------------------------------------------------------------------------------------------------------------------|
|              |        |        |     | AAGCTGAAGNNNNNNNNNTCTTGTATTA<br>ATGAAGATGCCGAT                                                                       |
| <b>RPN10</b> | 399740 | 399935 | 244 | TAAACCAAGGTGAAGAAAAGGAGCANN<br>NAGATCGGAAGAGCACACGTGACTCGCCA<br>AGCTGAAGNNNNNNNNNAAGATGACAA<br>TTTTGCTCTTGTG         |
| <b>RPN10</b> | 400015 | 400226 | 264 | AGACAATATTAATGCCTCCTTAACTCANN<br>NNAGATCGGAAGAGCACACGTGACTCGCC<br>AAGCTGAAGNNNNNNNNNTTACCACACG<br>TGTTACCATTATTA     |
| <b>RPN10</b> | 400232 | 400379 | 204 | CATATGCTGACTTTCTTCCAAAGATAATTG<br>NNNNAGATCGGAAGAGCACACGTGACTCG<br>CCAAGCTGAAGNNNNNNNNNCTTTTCTG<br>TATATCCCTTAAAGACA |
| <b>RPN10</b> | 400307 | 400505 | 253 | CTCATATTCTGGACATTCAATAAATCTACA<br>NNNNAGATCGGAAGAGCACACGTGACTCG<br>CCAAGCTGAAGNNNNNNNNNCTTCAATG<br>GTGGGTAAGTCATTAT  |
| <b>RPN10</b> | 400450 | 400642 | 247 | AGGAAATATTCAAGATGATGATCAGCTAC<br>NNNNAGATCGGAAGAGCACACGTGACTCG<br>CCAAGCTGAAGNNNNNNNNNAAGCAAT<br>TAATAAATACTGGGAAGC  |
| <b>RPN10</b> | 400668 | 400848 | 231 | TTCAC TTTTATTTTATCCCCGGCCANNNA<br>GATCGGAAGAGCACACGTGACTCGCCAAG<br>CTGAAGNNNNNNNNNGCTTCCCAGTATT<br>TATTAATTGCTT      |
| <b>RPN10</b> | 400771 | 400923 | 201 | AAGAAGTTTGTTAATAGCCCAGCTAGNNN<br>NAGATCGGAAGAGCACACGTGACTCGCCA<br>AGCTGAAGNNNNNNNNNTCGATTGTGTG<br>AATGTTCTGTG        |
| <b>RPN10</b> | 400922 | 401095 | 227 | TTTCATCAAACATATTGTACTCGTGAGNN<br>NNAGATCGGAAGAGCACACGTGACTCGCC<br>AAGCTGAAGNNNNNNNNNTTGTAGTGTA<br>AGCTCGTTTTATTAC    |
| <b>RPN10</b> | 400962 | 401136 | 226 | GTTTCCCTTTTGTAGATCGATTGTGTNNNN<br>AGATCGGAAGAGCACACGTGACTCGCCAA                                                      |

---

---

|              |        |        |     |                                                                                                                      |
|--------------|--------|--------|-----|----------------------------------------------------------------------------------------------------------------------|
|              |        |        |     | GCTGAAGNNNNNNNNNNNACAATGGCGCA<br>TAAATATAGAAAAA                                                                      |
| <b>RPN10</b> | 401125 | 401270 | 200 | CTGTGATAAAAATCTGTTAGGGACTATATC<br>NNNNAGATCGGAAGAGCACACGTGACTCG<br>CCAAGCTGAAGNNNNNNNNNNNTCAAAC<br>ATATTGTACTCGTGAGA |
| <b>RPN10</b> | 400450 | 400642 | 234 | CCACAATGGCGCATAAATATAGAAAAANN<br>NNAGATCGGAAGAGCACACGTGACTCGCC<br>AAGCTGAAGNNNNNNNNNNNAGAAAGAAA<br>AATGAGCAATATCGAA  |

---

<sup>a</sup> Gene location in the *P. falciparum* 3D7 reference strain.
